# Supplementary material
Source: PubMed Central journal article supplement (PMC533053)
Supplement: 7600468s1.pdf [file 7600468s1.pdf]

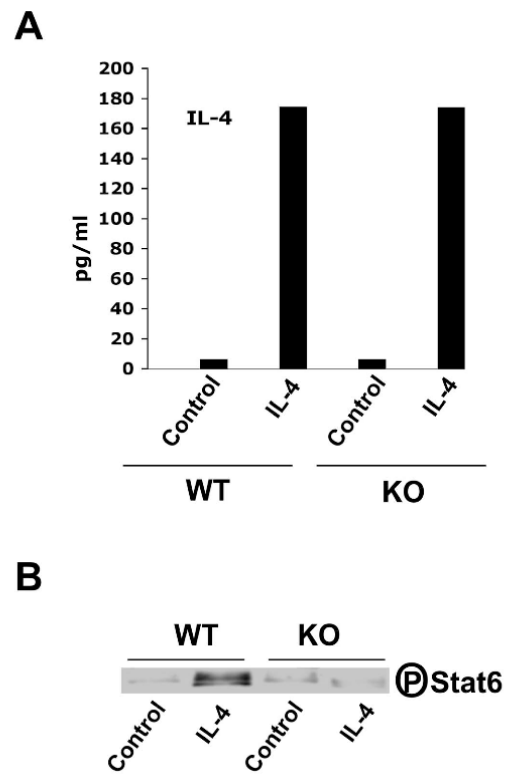

**Supplementary figure 1.** Stat6 phosphorylation in IL-4-injected mice.

WT and PKC $\zeta$  KO mice were injected with 100ng of IL-4. Mice were sacrificed 1 h later and IL-4 serum levels were determined by ELISA (A), and Stat6 phosphorylation in liver extracts was determined by immunoblotting (B). This is a representative experiment of another one with identical results.
