# Supplementary material
Source: PubMed Central journal article supplement (PMC533053)
Supplement: 7600468s2.pdf [file 7600468s2.pdf]

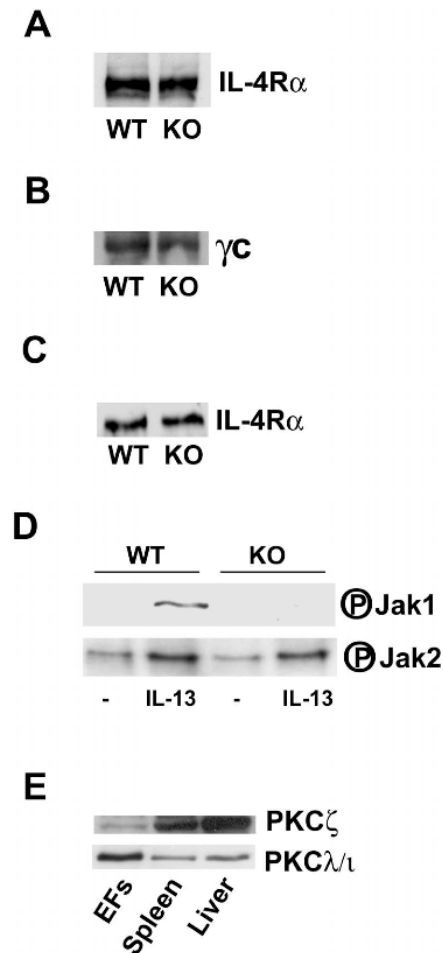

**Supplementary figure 2.** IL-4 receptor integrity.

Splenocytes from WT and PKC $\zeta$  KO mice were analyzed by immunoblotting with an anti-IL4R $\alpha$  (A) or anti- $\gamma$ c (B) antibodies. Likewise EFs from WT and PKC $\zeta$  KO mice were analyzed with anti-IL4R $\alpha$  as above (C). EFs from these mice were stimulated or not with 10 ng/ml of IL-13 for 10 min, after which Jak1 and Jak2 phosphorylation was determined by immunoblotting. Levels of PKC $\zeta$  and PKC $\lambda$  $\iota$  were determined in different tissues by immunoblot analysis.
