# Supplementary material
Source: PubMed Central journal article supplement (PMC533053)
Supplement: 7600468s3.pdf [file 7600468s3.pdf]

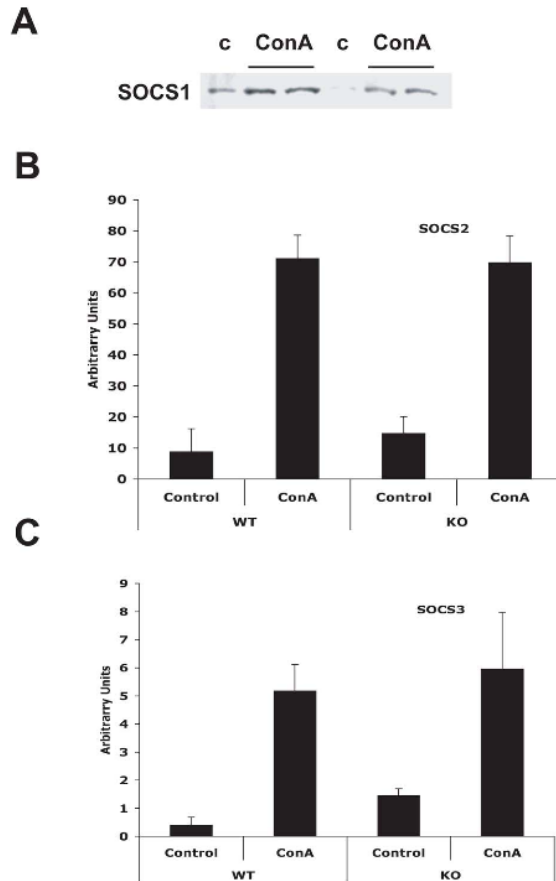

**Supplementary figure 3. SOCS levels in livers from PKC $\zeta$ <sup>-/-</sup> mice.**

(A) SOCS1 levels were determined by immunoblotting of liver extracts from mice 2 hr after injection with ConA. Representative autoradiographs are displayed of 1 mouse untreated and 2 mice injected with 12  $\mu$ g/g of ConA either WT or PKC $\zeta$  KO of a total of n= 5 for each genotype. (B) Liver mRNA levels of SOCS2 (B) and SOCS3 (C) were determined by real time RT-PCR 8 hr after injection with ConA. Results are the mean  $\pm$  SD of n= 5 for each genotype.
