# Supplementary material
Source: PubMed Central journal article supplement (PMC533053)
Supplement: 7600468s4.pdf [file 7600468s4.pdf]

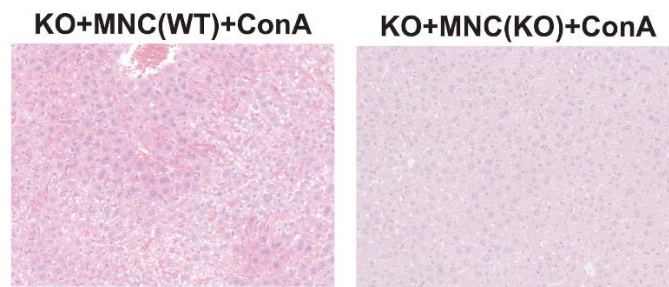

**Supplementary figure 4.** Liver damage after adoptive transfer of WT hepatic mononuclear cells.

Total hepatic MNCs from WT mice were injected into the livers of PKC $\zeta$ <sup>-/-</sup> followed by 12  $\mu$ g/g of ConA injection, after which liver damage was determined by H&E (X20). These are representative results of n= 3 for each genotype.
