# Supplementary material
Source: PubMed Central journal article supplement (PMC533053)
Supplement: 7600468s5.pdf [file 7600468s5.pdf]

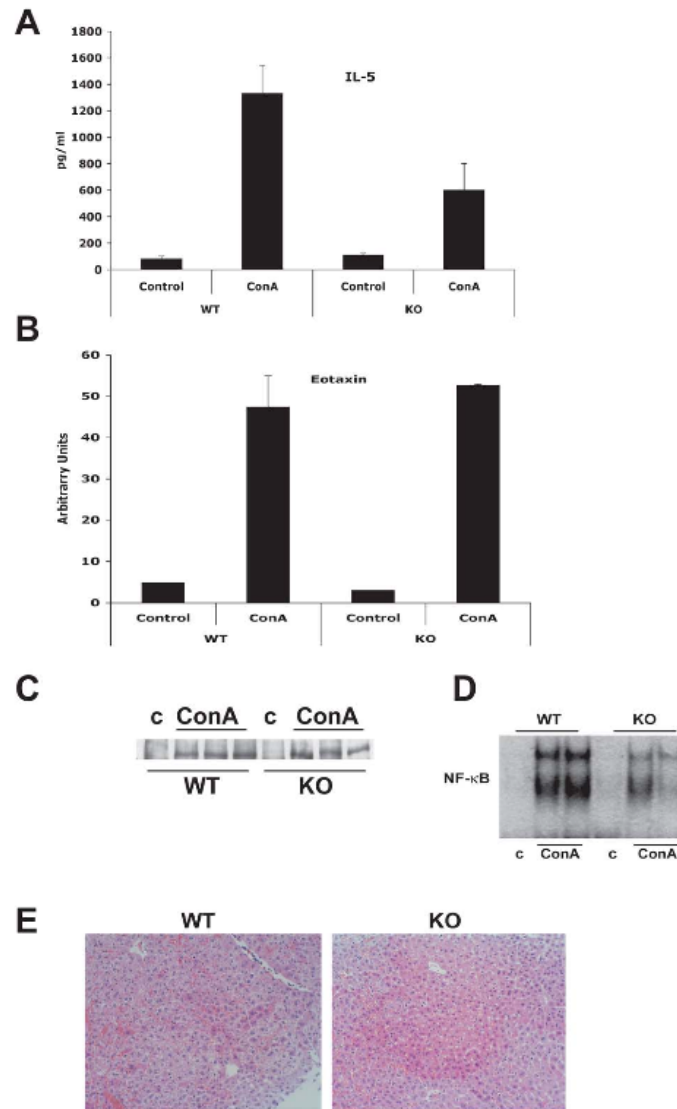

**Supplementary figure 5.** Stat6 and NF- $\kappa$ B activation by a high ConA dose.

WT and PKC $\zeta$  KO mice were injected with 20  $\mu$ g/g of ConA for 4 h, after which serum IL-5 levels (A), liver eotaxin mRNA levels (B), phospho-stat6 activation (C), EMSA of NF- $\kappa$ B (D) and liver H&E (X20) (E) were determined as described above. These are representative results of of n= 5 for each genotype.
